# Supplementary material for: Long-Term Effects of Repetitive Mild Traumatic Injury on the Visual System in Wild-Type and TDP-43 Transgenic Mice
Source: MDPI journal article supplement (doi:10.3390/ijms22126584), 2021-06-19
Supplement: s1 [file s1]

**Supplementary Figure S1.** Representative microphotographs of the optic tracts in wild-type (WT) and TDP-43<sup>G348C</sup> mice at six months after repetitive mild traumatic brain injury (rmTBI) or sham procedure (Sham), immunostained with anti-ionized calcium-binding adaptor molecule 1 (Iba1), showing different morphological forms of microglial cells. Arrowheads point to Iba1-positive cells with “resting” morphology, and arrows point to Iba1-positive cells with various activated forms. Scale bar: 25  $\mu\text{m}$ .

**Supplementary Figure S2.** Fluoro-Jade C and cresyl-violet stained sections of the lateral geniculate nucleus (LGN) and the superior colliculus (SC) in wild-type (WT) and TDP-43<sup>G348C</sup> mice at six months after repetitive mild traumatic brain injury (rmTBI). Representative microphotographs of the Fluoro-Jade C stained sections of (A) the LGN and (D) the SC. (A) Denoted lines indicate the LGN. (D) Arrows point to Fluoro-Jade C positive staining in the SC. Scale bar for (A) the LGN: 200  $\mu\text{m}$ , and (D) the SC: 50  $\mu\text{m}$ . (E) The histogram shows the intensity levels of the fluorescent staining (A.U./ $\mu\text{m}^2$ ) in the SC of WT and TDP-43<sup>G348C</sup> mice of the control groups (Sham) and animals with rmTBI. Results are expressed as means  $\pm$  SEM (N = 4). Representative microphotographs of the cresyl-violet stained sections of (B) the LGN and (F) the SC. Scale bar: 100  $\mu\text{m}$ . Histograms show the number of cresyl-violet positive neurons/ $\text{mm}^2$  in (C) the LGN and (G) the SC of WT and TDP-43<sup>G348C</sup> mice of the control groups (Sham) and animals with rmTBI. Results are expressed as means  $\pm$  SEM (N = 3–5).

**Supplementary Figure S3.** The activity of the glial cells in the lateral geniculate nucleus (LGN) and the superior colliculus (SC) in wild-type (WT) and TDP-43<sup>G348C</sup> mice at six months after repetitive mild traumatic brain injury (rmTBI). Representative microphotographs of the sections of (A) the LGN and (D) the SC immunostained with anti-ionized calcium-binding adaptor molecule 1 (Iba1). Arrowheads point to the “resting” microglia. Scale bar: 100  $\mu\text{m}$ . Histograms show the numbers of Iba1-positive cells/ $\text{mm}^2$  in (B) the LGN and (E) the SC of WT and TDP-43<sup>G348C</sup> mice with rmTBI and related control groups (Sham). Results are expressed as means  $\pm$  SEM (N = 3–5). Representative microphotographs of the sections (C) of the LGN and (F) the SC immunostained with anti-glial fibrillary acidic protein. Scale bar: 100  $\mu\text{m}$ .

**Supplementary Figure S4.** Synaptic plasticity in the lateral geniculate nucleus (LGN) and the superior colliculus (SC) in wild-type (WT) and TDP-43<sup>G348C</sup> mice at six months after repetitive

mild traumatic brain injury (rmTBI). Representative microphotographs of the sections of (A) the LGN and (C) the SC immunostained with anti-synaptophysin (SYP). Scale bar: 100  $\mu\text{m}$ . Histograms show the SYP intensity (A.U.) in (B) the LGN and (D) the SC of WT and TDP-43<sup>G348C</sup> mice with rmTBI and related control groups (Sham). Results are expressed as means  $\pm$  SEM (N = 3–4).
